# Supplementary material
Source: publisher figshare collection journal article supplement (https://frontiersin.figshare.com/ndownloader/files/13623122)
Supplement: Supplementary file 1 [file 13623122]

**Supplementary tables**

S3. Limits of detection for trace metal analyses calculated from triplicate blank samples

| **Trace metal** | **Detection limit [µg/L]** | **Trace metal** | **Detection limit [µg/L]** |
| --- | --- | --- | --- |
| Al | 0.182 | Ni | 0.009 |
| Ti | 0.037 | Cu | 0.010 |
| V | 0.008 | Zn | 0.042 |
| Cr | 0.012 | As | 0.007 |
| Mn | 0.005 | Sr | 0.032 |
| Fe | 0.384 | Cd | 0.012 |
| Co | 0.007 | Pb | 0.015 |
| U | 0.008 |  |  |
